# Supplementary material for: Sensitive mass spectrometric analysis of carbonyl metabolites in human urine and fecal samples using chemoselective modification
Source: Royal Society of Chemistry journal article supplement (doi:10.1039/d0an00150c), 2020-01-01
Supplement: d0an00150c1.pdf [file d0an00150c1.pdf]

## SUPPLEMENTARY INFORMATION

### Sensitive mass spectrometric analysis of carbonyl metabolites in human urine and fecal samples using chemoselective modification

Weifeng Lin,<sup>a</sup> Louis P. Conway,<sup>a</sup> Annika Block,<sup>a</sup> Greta Sommi,<sup>a</sup> Miroslav Vujasinovic,<sup>b</sup> J.-Matthias Löhr,<sup>b,c</sup> and Daniel Globisch<sup>\*a</sup>

[a] Department of Medicinal Chemistry, Science for Life Laboratory  
Uppsala University  
Box 574, SE-75123 Uppsala, Sweden

[b] Department for Digestive Diseases, Karolinska University Hospital, Stockholm, Sweden

[c] Department of Clinical Science, Intervention and Technology (CLINTEC), Karolinska Institute, Stockholm, Sweden

### Contents

|                             |   |
|-----------------------------|---|
| 1. Supporting Schemes ..... | 2 |
| 2. Supporting Figures ..... | 3 |
| 3. Supporting Tables .....  | 6 |

## 1. Supporting Schemes

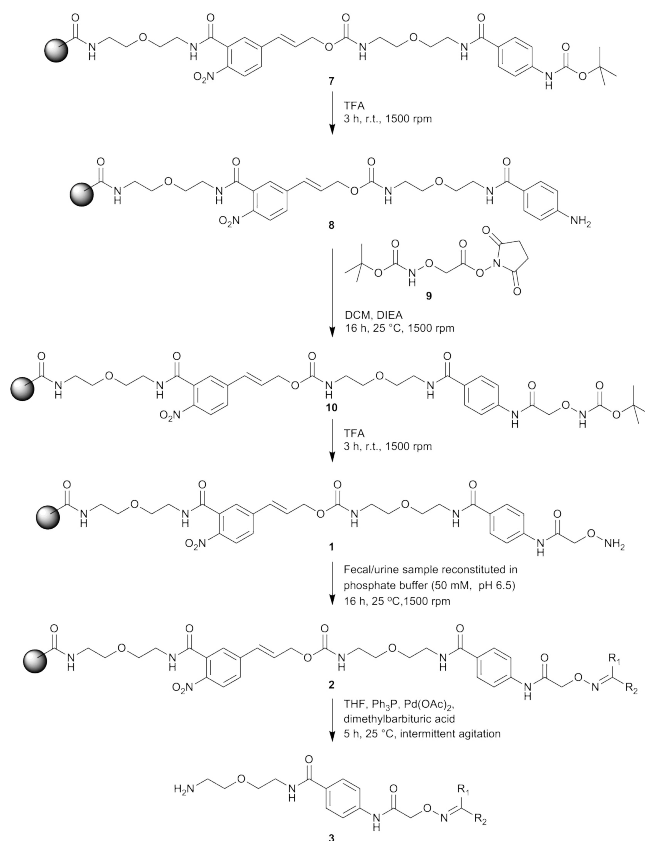

**Scheme S1:** Preparation of immobilized chemoselective probe activated for carbonyl conjugation.

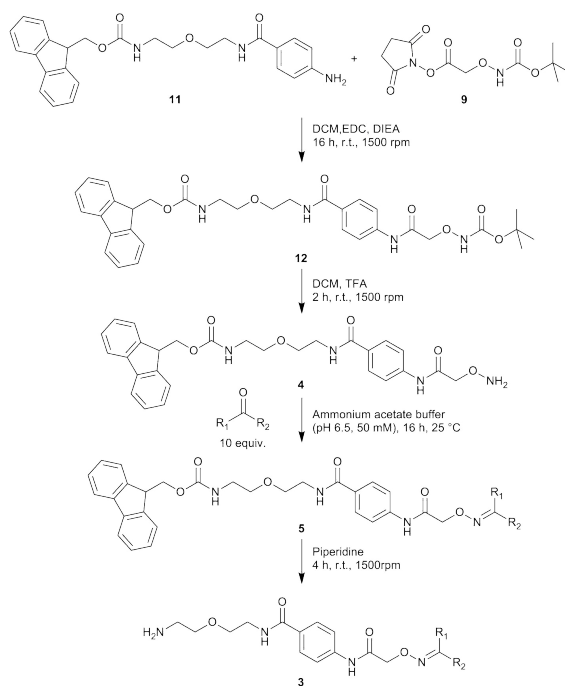

**Scheme S2:** Preparation of metabolite conjugates for carbonyl-containing metabolites library construction.

## 2. Supporting Figures

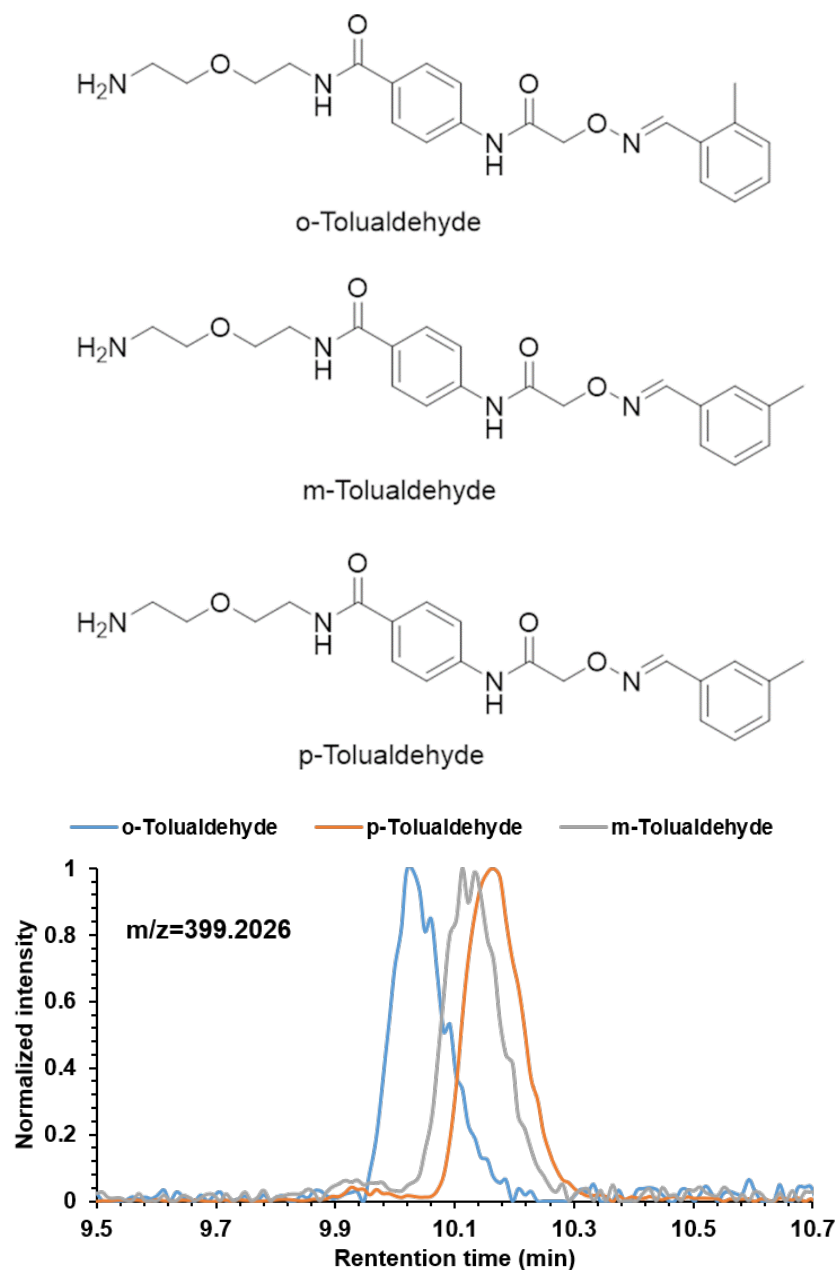

**Figure S1:** Examples of three extracted ion chromatograms of the LC-MS analysis of the three regioisomers of conjugated *o*-, *m*-, and *p*-tolualdehyde.

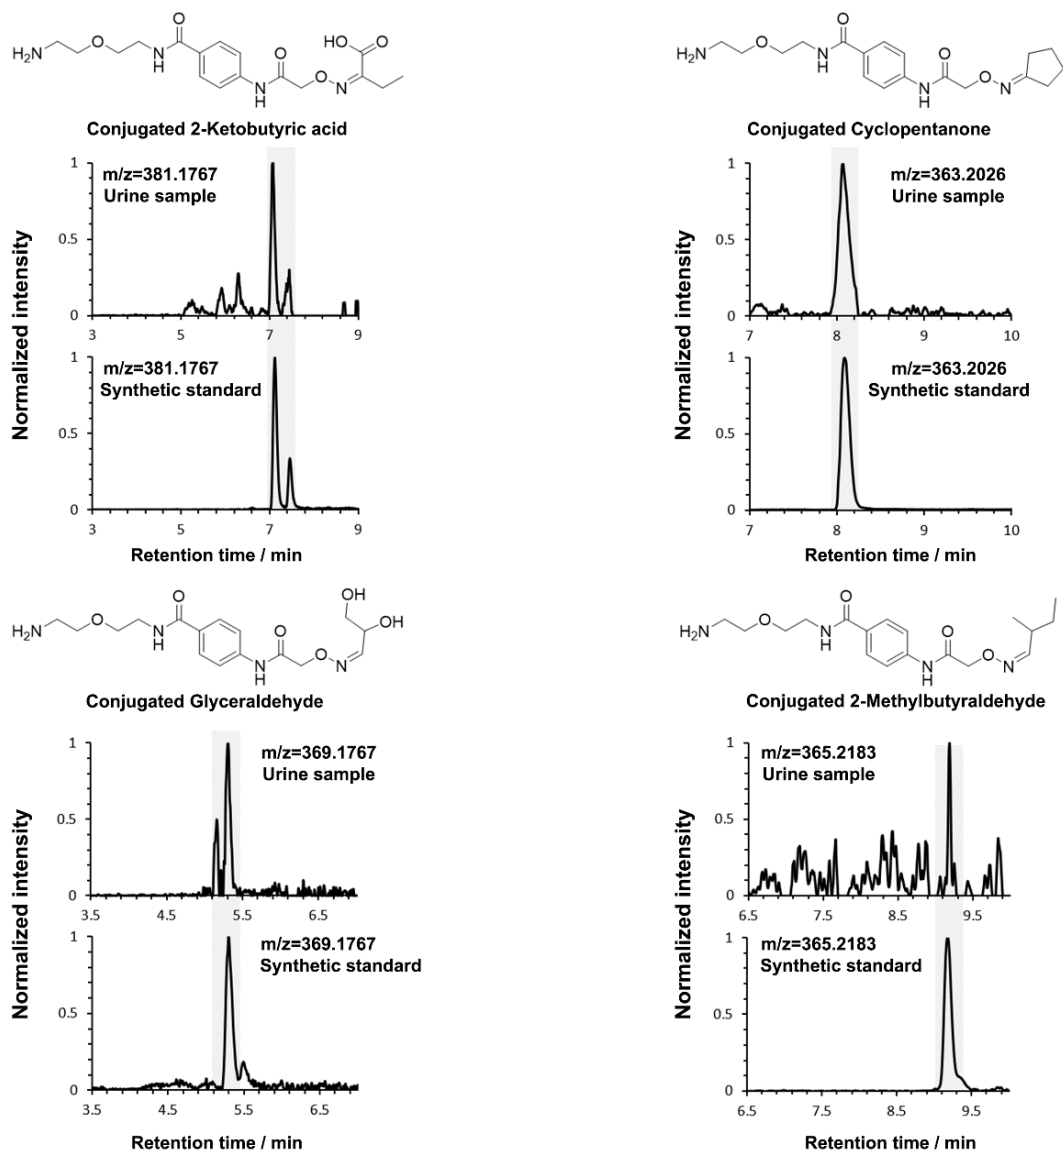

**Figure S2:** Representative extracted ion chromatograms of LC-MS co-injection experiments for validation of metabolites in urine samples.

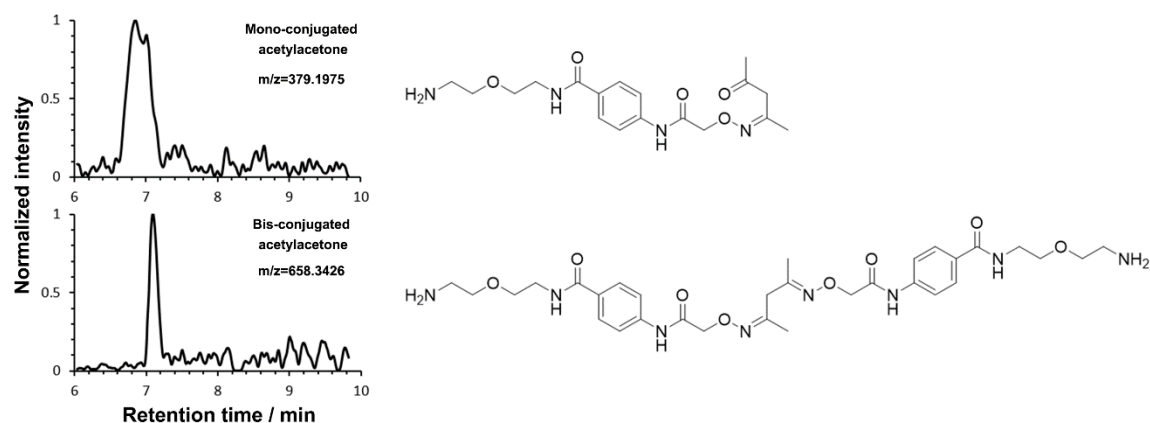

**Figure S3:** Mono- and bis-conjugated adducts of acetylacetone.

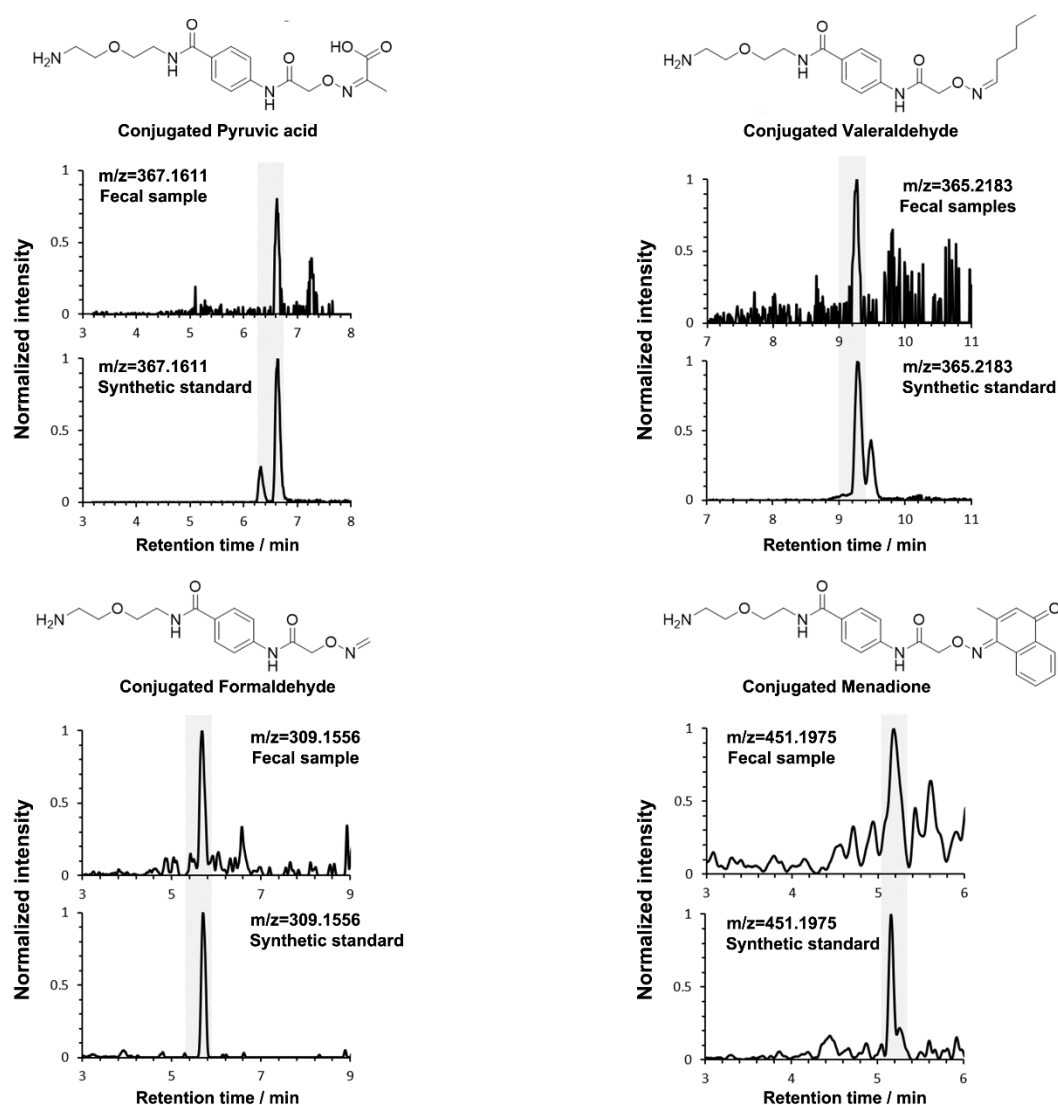

**Figure S4:** Representative extracted ion chromatograms of LC-MS co-injection experiments for validation of metabolites in fecal samples.

### 3. Supporting Tables

**Table S1.** 99 metabolites detected after analysis of urine samples using the carbonyl-specific chemical probe. Plausible metabolites were annotated using HMDB comparison.

| Annotated Carbonyl conjugates                                                                                                   | Predicted m/z |          |          |
|---------------------------------------------------------------------------------------------------------------------------------|---------------|----------|----------|
|                                                                                                                                 | U8            | U15      | U20      |
| 4-Hydroxy-2-oxobutanoic acid; xi-3-Hydroxy-2-oxobutanoic acid                                                                   | 397.1707      |          |          |
| 5,8-dihydroxy-2-(1-hydroxy-3-methoxy-4-oxocyclohexyl)-3,7-dimethoxy-4H-chromen-4-one;                                           |               |          | 659.2526 |
| L-4-Hydroxyglutamate semialdehyde                                                                                               |               | 426.1983 |          |
| L-4-Hydroxyglutamate semialdehyde                                                                                               |               | 426.1978 |          |
| (+)-12a-Hydroxypachyrhizone;                                                                                                    |               |          |          |
| [2-ethyl-5-(3,5,7-trihydroxy-3,4-dihydro-2H-1-benzopyran-2-yl)phenyl]oxidanessulfonic acid                                      |               | 661.2162 |          |
| (2E,11Z)-5-[5-(Methylthio)-4-penten-2-ynyl]-2-furanacrolein                                                                     |               | 511.2015 |          |
| Polyporusterone E; Polyporusterone D; Polyporusterone G                                                                         |               | 739.4612 |          |
| [(4-{3-[2-(2,4-dihydroxyphenyl)-2-oxoethyl]-4,6-dihydroxy-2-methoxyphenyl}-2-methylbut-2-en-1-yl)oxy]sulfonic acid              | 733.2366      | 733.2355 | 733.2355 |
| {2-[5,7-dihydroxy-2-(4-hydroxy-3-methoxyphenyl)-4-oxo-4H-chromen-6-yl]-4-hydroxy-6-methyl-5-oxooxan-3-yl}oxidanessulfonic acid; | 803.2059      |          |          |
| 1,1-Dibromo-1-chloro-2-propanone                                                                                                | 526.9680      |          | 526.9688 |
| 1,3-Diphenyl-1-propanone; 1,3-Diphenyl-2-propanone; Lactarviolin                                                                |               | 489.2516 |          |
| 1-[4,9-Dihydro-2-(methylthio)-1,3-thiazino[6,5-b]indol-4-yl]-2-propanone                                                        |               |          | 569.2010 |
| 14-hydroxy-E4-neuroprostane; 17-hydroxy-E4-neuroprostane; 20-hydroxy-E4-neuroprostane;                                          |               | 655.3669 |          |
| 4-hydroxy-D4-neuroprostane; 7-hydroxy-D4-neuroprostane; Prehumulone; Macrophorin C;                                             |               |          |          |
| 1-deoxy-1-(N6-lysino)-D-fructose                                                                                                |               | 412.1823 | 412.1821 |
| 2-(dimethylamino)acetaldehyde; 4-Aminobutyraldehyde                                                                             | 366.2141      |          | 366.2139 |
| 2,3,4,5,6-Penta-O-acetyl-D-glucose; Monotropein                                                                                 | 669.2641      |          |          |
| 2,3-Dimethyl-2-cyclohexen-1-one; 6-Methyl-3,5-heptadien-2-one; (E,E)-2,4-Octadienal;                                            |               |          |          |
| trans, trans-3,5-Octadien-2-one; 1,5-Octadien-3-one; (E,E)-2,6-Octadienal;                                                      |               | 403.2328 |          |
| 3,5,5-Trimethyl-2-cyclopenten-1-one; Methyl-1-cyclopenten-1-yl)-ethanone;                                                       |               |          |          |
| 2-[(5,7-dihydroxy-2-(4-hydroxy-3-methoxyphenyl)-5H-chromen-3-yl)oxy]oxane-3,4,5-triol;                                          |               |          |          |
| Luteolinidin 3-O-glucoside; Pelargonidin 3-galactoside; Cyanidin 3-rhamnoside;                                                  | 712.2549      | 712.2599 | 712.255  |
| Peonidin 3-arabinoside; Petunidin 3-arabinoside; Pelargonidin 5-galactoside;                                                    |               |          |          |
| Isopeonidin 3-arabinoside; Isopeonidin 3-xyloside; Peonidin 3-xyloside;                                                         |               |          |          |
| 2-Aminomuconic acid semialdehyde                                                                                                |               |          | 420.1868 |
| 2-Decarboxybetanin                                                                                                              | 786.3025      |          | 786.3032 |
| 3-Oxalanine                                                                                                                     |               | 382.1714 |          |
| 3-Phenylpropionylglycine                                                                                                        |               |          | 486.2345 |
| 3'-Sialyllactose; 6'-Sialyllactose                                                                                              |               | 912.3558 |          |
| 4-(2-Amino-3-hydroxyphenyl)-2,4-dioxobutanoic acid                                                                              |               | 502.1919 |          |
| 4-(Methylthio)-2-butanone; 4-Mercapto-2-pentanone; S-Propyl thioacetate;                                                        |               |          |          |
| 3-Mercapto-2-pentanone; 2-Mercapto-3-pentanone; Tetrahydro-2-methylthiophen-3-ol;                                               |               |          |          |
| Tetrahydro-2-methyl-3-furanthiol; 1-(Methylthio)-2-butanone; 4-(Methylthio)butanal;                                             |               | 397.1903 |          |
| xi-2-Methyl-1,3-oxathiane; 3-(Methylthio)butanal; 3-(Methylthio)-2-butanone                                                     |               |          |          |
| 4-(Methylthio)-2-butanone; 4-Mercapto-2-pentanone; S-Propyl thioacetate;                                                        |               |          |          |
| 3-Mercapto-2-pentanone; 2-Mercapto-3-pentanone; Tetrahydro-2-methylthiophen-3-ol;                                               |               | 397.1907 |          |
| Tetrahydro-2-methyl-3-furanthiol; 1-(Methylthio)-2-butanone; 4-(Methylthio)butanal;                                             |               |          |          |
| xi-2-Methyl-1,3-oxathiane; 3-(Methylthio)butanal; 3-(Methylthio)-2-butanone                                                     |               |          |          |
| 4',5,6-Trimethylscutellarein 7-glucoside                                                                                        | 769.2956      | 769.2938 | 769.2948 |
| 4,6-Dihydroxy-2-quinolinecarboxylic acid                                                                                        |               | 484.1809 |          |
| 4-[(2-Furanylmethyl)thio]-2-pentanone                                                                                           |               | 477.2164 |          |
| 4-[(2-Furanylmethyl)thio]-2-pentanone                                                                                           |               | 477.2178 |          |
| 4-Acetylimidazo[4,5-c]pyridine                                                                                                  |               | 440.2053 |          |
| 4-Mercapto-4-methyl-2-pentanone; 4-(Methylthio)-2-pentanone;                                                                    | 411.2052      |          | 411.2057 |
| 3-Mercapto-2-methylpentanal;                                                                                                    |               |          |          |
| 5,7-Dihydroxy-3',4'-dimethoxy-8-(3-hydroxy-3-methylbutyl)-                                                                      |               | 841.3455 |          |
| isoflavone 7-glucoside                                                                                                          |               |          |          |
| 5-Chloro-4-(2-imidazolin-4-on-2-ylamino)-2,1,3-benzothiazdiazole                                                                |               | 532.1634 |          |
| 5-Hydroxyindoleacetaldehyde; Hydroxymethyl indol-3-yl ketone;                                                                   |               |          | 454.2079 |
| 1-Methoxy-1H-indole-3-carboxaldehyde                                                                                            |               |          |          |
| 5-Methyl-2,5-di-1-pyrrolidinyl-2-cyclopenten-1-one                                                                              | 513.3169      |          |          |
| 6-[(5-acetyl-1-benzofuran-4-yl)oxy]-3,4,5-trihydroxyoxane-2-carboxylic acid                                                     |               | 631.2223 |          |
| 6-[4-(2-carboxy-2-oxoethyl)-2-methoxyphenoxy]-3,4,5-trihydroxyoxane-2-carboxylic acid                                           |               | 665.2338 |          |
| 7-methoxy-3-(3-methoxyphenyl)-4H-chromen-4-one;                                                                                 |               |          |          |
| 2-(3,5-dimethoxyphenyl)-4H-chromen-4-one;                                                                                       |               |          |          |
| 5,7-Dimethoxyisoflavone;                                                                                                        |               | 561.2324 |          |
| 5,6-Dimethoxyflavone; 5,7-Dimethoxyflavone; 5-Hydroxy-                                                                          |               |          |          |
| 7-methoxy-6-methylflavone                                                                                                       |               |          |          |
| Acetaldehyde                                                                                                                    |               |          | 323.1710 |
| Alloxan                                                                                                                         |               |          | 421.1472 |
| Anisindione; 7-Hydroxy-2-methylisoflavone                                                                                       | 531.2236      | 531.2238 | 531.2226 |
| Apigenin 4'-O-glucoside                                                                                                         | 711.2529      | 711.2529 | 711.2525 |
| Apigenin 4'-O-glucoside                                                                                                         |               | 711.2543 |          |
| Artonin T; Cajaisoflavone; Dihydrocycloartominin; Dihydroisocycloartominin; Cycloaitilisin                                      |               | 729.3100 |          |
| C <sub>15</sub> H <sub>12</sub> O <sub>5</sub> S                                                                                |               | 631.1735 |          |
| C <sub>20</sub> H <sub>18</sub> O <sub>7</sub>                                                                                  |               |          | 649.2521 |
| C <sub>21</sub> H <sub>22</sub> O <sub>10</sub>                                                                                 |               | 713.2637 |          |

| Annotated Carbonyl conjugates                                                                                                                                                                  | Predicted m/z |          |          |
|------------------------------------------------------------------------------------------------------------------------------------------------------------------------------------------------|---------------|----------|----------|
|                                                                                                                                                                                                | U8            | U15      | U20      |
| C <sub>21</sub> H <sub>24</sub> O <sub>6</sub>                                                                                                                                                 |               | 651.3061 |          |
| C <sub>24</sub> H <sub>26</sub> O <sub>12</sub>                                                                                                                                                | 785.2907      |          | 785.2847 |
| C <sub>24</sub> H <sub>34</sub> O <sub>20</sub>                                                                                                                                                | 921.3119      |          |          |
| C <sub>26</sub> H <sub>28</sub> O <sub>12</sub>                                                                                                                                                |               | 811.3043 |          |
| C <sub>27</sub> H <sub>34</sub> O <sub>16</sub>                                                                                                                                                |               | 893.326  |          |
| C <sub>31</sub> H <sub>37</sub> N <sub>3</sub> O <sub>11</sub> S                                                                                                                               | 938.3573      |          |          |
| Carbamazepine-O-quinone                                                                                                                                                                        | 545.2161      |          | 545.2168 |
| Chlorosesamone                                                                                                                                                                                 | 571.1957      |          |          |
| Chrycorin                                                                                                                                                                                      |               | 499.2002 |          |
| Cinnamaldehyde; (Z)-3-Phenyl-2-propenal; Indanone; 2-Methylcumarone; Atropaldehyde                                                                                                             |               | 411.2033 |          |
| Cyclopassilic acid D; 6beta-Hydroxyasialic acid; Isothiankunic acid; (3beta,19alpha)-3,19,23,24-Tetrahydroxy-12-oleanen-28-oic acid                                                            |               | 783.4877 |          |
| Deoxyribose 5-phosphate; 1-Deoxy-D-xylulose 5-phosphate; Deoxyribose 1-phosphate; Deoxyribose 5-monophosphate; 5-Deoxyribose-1-phosphate                                                       |               | 493.1689 |          |
| DHAP(18:0); LysoPA(0:0/18:1(9Z)); LysoPA(18:1(9Z)/0:0)                                                                                                                                         |               | 715.4006 |          |
| DHAP(6:0); Homolanthionine; Formononetin                                                                                                                                                       |               | 547.2163 |          |
| DHAP(6:0); Homolanthionine; Formononetin                                                                                                                                                       |               | 547.2155 |          |
| DHAP(8:0); Demethoxyegonol; Desmosflavone; Dimethylstrobilchrysin; 4'-Hydroxy-R-phenprocoumon; 6-Hydroxy-R-phenprocoumon; 8-Hydroxy-R-phenprocoumon; 7-Hydroxy-R-phenprocoumon                 |               | 575.2492 |          |
| Erythrose; L-Erythrulose                                                                                                                                                                       | 399.1863      |          |          |
| FAPy-adenine                                                                                                                                                                                   |               | 432.2095 |          |
| FAPy-adenine                                                                                                                                                                                   |               | 432.2093 |          |
| Genistein 4',7-O-diglucuronide                                                                                                                                                                 |               | 901.2606 |          |
| Glycolaldehyde                                                                                                                                                                                 | 339.166       | 339.166  | 339.1658 |
| Hydroxysepiapterin                                                                                                                                                                             | 532.2244      |          |          |
| Indolepyruvate                                                                                                                                                                                 |               | 482.2046 |          |
| Isocarlinoside; Neocarlinoside; Kaempferol 3-[apiosyl-(1->2)-galactoside]; Rustoside; Quercetin 3-[rhamnosyl-(1->2)-alpha-L-arabinopyranoside]; Graveobioside A; Kaempferol 3-xylosylglucoside | 859.2863      |          |          |
| Isolimononic acid                                                                                                                                                                              |               | 785.3637 |          |
| L-2-Amino-3-oxobutanoic acid; L-Aspartate-semialdehyde                                                                                                                                         | 396.187       | 396.1873 | 396.1869 |
| Laccarin                                                                                                                                                                                       | 473.2502      |          |          |
| Lactaldehyde; 3-Hydroxypropanal; Hydroxyacetone                                                                                                                                                | 353.1816      | 353.1816 | 353.1816 |
| Lactaldehyde; 3-Hydroxypropanal; Hydroxyacetone                                                                                                                                                | 353.1822      |          |          |
| L-Furosine; Pyrraline                                                                                                                                                                          |               | 533.2709 |          |
| Luteolin 4'-glucoside 7-galacturonide                                                                                                                                                          |               | 903.2754 |          |
| Mesoxalic acid                                                                                                                                                                                 |               | 397.1355 |          |
| Musanolone F                                                                                                                                                                                   |               | 597.2318 |          |
| N-(1-Deoxy-1-fructosyl)histidine                                                                                                                                                               | 596.2656      |          |          |
| N-[[3-(b-D-Glucopyranosyloxy)-2,3-dihydro-2-oxo-1H-indol-3-yl]acetyl]aspartic acid; Silidianin                                                                                                 | 763.2822      |          |          |
| N-Acetyl-L-glutamate 5-semialdehyde                                                                                                                                                            |               | 452.214  | 452.2145 |
| Neocacrimarine K                                                                                                                                                                               |               | 838.3267 |          |
| Pefloxacin N-oxide                                                                                                                                                                             |               | 628.2912 |          |
| Polyporusterone B; Polyporusterone C                                                                                                                                                           |               | 755.4551 |          |
| Pyridoxal; Isopyridoxal; 3alpha,4,5,7alpha-Tetrahydro-5-hydroxy-1H-isoindole-1,3(2H)-dione; 3alpha,4,7,7alpha-Tetrahydro-4-hydroxy-1H-isoindole-1,3(2H)-dione                                  |               | 446.203  |          |
| Pyroglutamylglycine                                                                                                                                                                            |               | 465.2087 |          |
| Pyroglutamylglycine                                                                                                                                                                            |               | 465.21   |          |
| Pyruvic acid; Malonic semialdehyde; Glucosereductone                                                                                                                                           |               | 367.1615 |          |
| Pyruvic acid; Malonic semialdehyde; Glucosereductone                                                                                                                                           |               | 367.1606 |          |
| Quercetin 3-O-(6'-malonyl-glucoside) 7-O-glucoside                                                                                                                                             |               |          | 991.2982 |
| Shoyuflavone C                                                                                                                                                                                 |               | 697.2004 |          |
| Suprofen; Tiaprofenic acid                                                                                                                                                                     |               | 539.1934 |          |
| Uridine diphosphate acetylgalactosamine 4-sulfate                                                                                                                                              |               | 966.1865 |          |
| Uridine; Pseudouridine                                                                                                                                                                         |               | 523.2133 |          |
| xi-Dihydro-2-methyl-3(2H)-thiophenone; Dihydro-5-methyl-2(3H)-thiophenone; xi-2-Acetylthietane                                                                                                 | 395.1737      | 395.1744 | 395.1743 |

**Table S2.** Complete list of carbonyl-containing standard conjugates **3** sorted by molecular weight.

|    | HMDB ID     | Compound                       | Monoisotopic Mass | Conjugated m/z | RT/min |
|----|-------------|--------------------------------|-------------------|----------------|--------|
| 1  | HMDB0001426 | Formaldehyde                   | 30.0105           | 309.1556       | 5.70   |
| 2  | HMDB0000990 | Acetaldehyde                   | 44.0262           | 323.1713       | 6.34   |
| 3  | HMDB0001659 | Acetone                        | 58.0418           | 337.1869       | 7.07   |
| 4  | HMDB0003366 | Propanal                       | 58.0418           | 337.1869       | 7.16   |
| 5  | HMDB0003344 | Glycolaldehyde                 | 60.0212           | 339.1662       | 5.87   |
| 6  | HMDB0001167 | Pyruvaldehyde                  | 72.0211           | 351.1662       | 10.57  |
| 7  | HMDB0000474 | Butanone                       | 72.0575           | 351.2026       | 7.83   |
| 8  | HMDB0003543 | Butanal                        | 72.0575           | 351.2026       | 8.06   |
| 9  | HMDB0000119 | Glyoxylic acid                 | 74.0003           | 353.1454       | 5.77   |
| 10 | HMDB0006961 | Hydroxyacetone                 | 74.0368           | 353.1819       | 6.32   |
| 11 | HMDB0006458 | DL-Lactaldehyde                | 74.0368           | 353.1819       | 6.56   |
| 12 | HMDB0003453 | 3-Hydroxypropanal              | 74.0368           | 353.1819       | 6.86   |
| 13 | HMDB0031407 | Cyclopentanone                 | 84.0575           | 363.2026       | 8.10   |
| 14 | HMDB0003407 | Diacetyl                       | 86.0367           | 365.1818       | 7.28   |
| 15 | HMDB0034235 | 2-Pentanone                    | 86.0731           | 365.2182       | 8.67   |
| 16 | HMDB0031526 | 2-Methylbutyraldehyde          | 86.0732           | 365.2183       | 9.19   |
| 17 | HMDB0031206 | Valeraldehyde                  | 86.0732           | 365.2183       | 9.28   |
| 18 | HMDB0006478 | Isovaleraldehyde               | 86.0732           | 365.2183       | 9.12   |
| 19 | HMDB0000243 | Pyruvic acid                   | 88.0160           | 367.1611       | 6.63   |
| 20 | HMDB0003243 | Acetoin                        | 88.0524           | 367.1975       | 6.64   |
| 21 | HMDB0001051 | Glyceraldehyde                 | 90.0316           | 369.1767       | 5.30   |
| 22 | HMDB0001882 | Dihydroxyacetone               | 90.0317           | 369.1768       | 5.71   |
| 23 | HMDB0032914 | Furfural                       | 96.0211           | 375.1662       | 7.66   |
| 24 | HMDB0003315 | Cyclohexanone                  | 98.0731           | 377.2182       | 8.98   |
| 25 | HMDB0031496 | trans-2-Hexenal                | 98.0731           | 377.2182       | 10.01  |
| 26 | HMDB0031648 | Acetylacetone                  | 100.0524          | 379.1975       | 6.86   |
| 27 |             | Acetylacetone (bis-conjugated) |                   | 658.3426       | 7.09   |
| 28 | HMDB0031598 | 2,3-Pentanedione               | 100.0524          | 379.1975       | 8.13   |
| 29 | HMDB0029599 | Glutaraldehyde                 | 100.0525          | 379.1975       | 7.17   |
| 30 | HMDB0000753 | 3-Hexanone                     | 100.0888          | 379.2339       | 9.62   |
| 31 | HMDB0031578 | 2-Methylpentanal               | 100.0888          | 379.2339       | 9.76   |
| 32 | HMDB0031220 | 2-Ethylbutyraldehyde           | 100.0888          | 379.2339       | 9.86   |
| 33 | HMDB0002939 | 4-Methyl-2-pentanone           | 100.0888          | 379.2339       | 9.64   |
| 34 | HMDB0005994 | Hexanal                        | 100.0888          | 379.2339       | 10.35  |
| 35 | HMDB0005842 | 2-Hexanone                     | 100.0888          | 379.2339       | 9.83   |
| 36 | HMDB0000005 | 2-Ketobutyric acid             | 102.0316          | 381.1767       | 7.09   |
| 37 | HMDB0000060 | Lithium acetoacetate           | 102.0317          | 381.1768       | 7.12   |
| 38 | HMDB0001352 | $\beta$ -Hydroxypyruvic acid   | 104.0109          | 383.1560       | 5.13   |
| 39 | HMDB0006115 | Benzaldehyde                   | 106.0419          | 385.1870       | 9.36   |
| 40 | HMDB0000720 | Levulinic acid                 | 116.0473          | 395.1924       | 7.18   |
| 41 | HMDB0031522 | Mesoxalic acid                 | 117.9902          | 397.1353       | 5.09   |
| 42 | HMDB0002649 | Erythrose                      | 120.0422          | 399.1873       | 5.10   |
| 43 | HMDB0006293 | Erythrulose                    | 120.0422          | 399.1873       | 7.08   |
| 44 | HMDB0033910 | Acetophenone                   | 120.0575          | 399.2026       | 9.47   |
| 45 | HMDB0029636 | o-Tolualdehyde                 | 120.0575          | 399.2026       | 10.02  |
| 46 | HMDB0029638 | p-Tolualdehyde                 | 120.0575          | 399.2026       | 10.11  |
| 47 | HMDB0029637 | m-Tolualdehyde                 | 120.0575          | 399.2026       | 10.17  |

|    | HMDB ID     | Compound                         | Monoisotopic Mass | Conjugated m/z | RT/min |
|----|-------------|----------------------------------|-------------------|----------------|--------|
| 48 | HMDB0011718 | 4-Hydroxybenzaldehyde            | 122.0368          | 401.1819       | 8.00   |
| 49 | HMDB0034170 | Salicylaldehyde                  | 122.0368          | 401.1819       | 9.05   |
| 50 | HMDB0030776 | Maltol                           | 126.0316          | 405.1767       | 4.92   |
| 51 | HMDB0031294 | 2-Octanone                       | 128.1201          | 407.2652       | 11.29  |
| 52 | HMDB0001140 | Octanal                          | 128.1201          | 408.2725       | 11.58  |
| 53 | HMDB0000695 | alpha-ketoisocaproate            | 130.0629          | 409.2080       | 8.75   |
| 54 | HMDB0000491 | 3-Methyl-2-oxovaleric acid       | 130.0629          | 409.2080       | 8.84   |
| 55 | HMDB0000223 | Oxalacetic acid                  | 132.0058          | 411.1509       | 6.31   |
| 56 | HMDB0003441 | Trans-Cinnamaldehyde             | 132.0575          | 411.2026       | 10.18  |
| 57 | HMDB0003224 | 2-Deoxy-D-ribose                 | 134.0579          | 413.2030       | 5.57   |
| 58 | HMDB0002818 | Alloxan                          | 142.0014          | 421.1465       | 11.01  |
| 59 | HMDB0000646 | L-Arabinose                      | 150.0528          | 429.1979       | 5.21   |
| 60 | HMDB0000283 | Ribose                           | 150.0528          | 429.1979       | 5.21   |
| 61 | HMDB0036061 | Safranal                         | 150.1044          | 429.2495       | 10.99  |
| 62 | HMDB0035089 | R-Carvone                        | 150.1044          | 429.2495       | 11.34  |
| 63 | HMDB0035824 | Carvone                          | 150.1044          | 429.2495       | 11.68  |
| 64 | HMDB0035250 | Myrtenal                         | 150.1045          | 429.2496       | 11.44  |
| 65 | HMDB0012308 | Vanillin                         | 152.0473          | 431.1924       | 8.14   |
| 66 | HMDB0000849 | Rhamnose                         | 164.0684          | 443.2135       | 5.42   |
| 67 | HMDB0001545 | Pyridoxal                        | 167.0582          | 446.2033       | 5.99   |
| 68 | HMDB0033713 | 2-Undecanone                     | 170.1670          | 449.3121       | 12.81  |
| 69 | HMDB0001892 | Menadione                        | 172.0524          | 451.1975       | 5.16   |
| 70 | HMDB0003466 | L-Gulonic acid $\gamma$ -lactone | 178.0477          | 457.1928       | 7.65   |
| 71 | HMDB0000707 | 4-Hydroxyphenylpyruvic acid      | 180.0422          | 459.1873       | 9.24   |
| 72 | HMDB0000169 | D-Mannose                        | 180.0633          | 459.2084       | 5.12   |
| 73 | HMDB0001151 | D-Allose                         | 180.0633          | 459.2084       | 5.17   |
| 74 | HMDB0000122 | D-Glucose                        | 180.0633          | 459.2084       | 5.08   |
| 75 | HMDB0000660 | D-Fructose                       | 180.0633          | 459.2084       | 5.08   |
| 76 | HMDB0001266 | L-Sorbose                        | 180.0633          | 459.2084       | 5.11   |
| 77 | HMDB0033704 | Galactose                        | 180.0634          | 459.2085       | 5.11   |
| 78 | HMDB0000684 | L-Kynurenine                     | 208.0847          | 487.2298       | 12.64  |
| 79 | HMDB0032797 | Jasmonic acid                    | 210.1255          | 489.2706       | 10.14  |
| 80 | HMDB0000803 | N-Acetylglucosamine              | 221.0899          | 500.2350       | 5.41   |
| 81 | HMDB0001548 | D-Ribose 5-phosphate             | 230.0191          | 509.1642       | 5.37   |
| 82 | HMDB0000296 | Uridine                          | 244.0695          | 523.2146       | 13.95  |
| 83 | HMDB0003312 | Daidzein                         | 254.0579          | 533.2030       | 8.46   |
| 84 | HMDB0001401 | D-Glucose 6-phosphate            | 258.0151          | 537.1602       | 5.22   |
| 85 | HMDB0001254 | Glucosamine 6-phosphate          | 259.0457          | 538.1908       | 4.54   |
| 86 | HMDB0015008 | Suprofen                         | 260.0507          | 539.1958       | 9.26   |
| 87 | HMDB0001358 | Retinal                          | 284.2140          | 563.3591       | 14.35  |
| 88 | HMDB0005800 | Luteolin                         | 286.0477          | 565.1928       | 7.58   |
| 89 | HMDB0061073 | Noroxymorphone                   | 287.1158          | 566.2609       | 6.06   |
| 90 | HMDB0000975 | Trehalose                        | 342.1162          | 621.2613       | 5.08   |
| 91 | HMDB0000186 | $\alpha$ -Lactose                | 342.1162          | 621.2613       | 5.10   |
| 92 | HMDB0000163 | Maltose                          | 342.1162          | 621.2613       | 5.06   |
| 93 | HMDB0000015 | Cortexolone                      | 346.2144          | 625.3595       | 11.38  |
| 94 | HMDB0000163 | Maltotriose                      | 504.1690          | 783.3141       | 5.16   |

**Table S3.** An overview of captured metabolites has been compiled detailing metabolic sources and biological importance

| Metabolite            | Fecal | Urine | Source                                                                                                                                                                                                                                                                  | Biological relevance                                                                                                  |
|-----------------------|-------|-------|-------------------------------------------------------------------------------------------------------------------------------------------------------------------------------------------------------------------------------------------------------------------------|-----------------------------------------------------------------------------------------------------------------------|
| Formaldehyde          |       |       | Endogenous & food                                                                                                                                                                                                                                                       |                                                                                                                       |
| Acetaldehyde          |       |       | Endogenous & food                                                                                                                                                                                                                                                       |                                                                                                                       |
| Acetone               |       |       | Endogenous & food                                                                                                                                                                                                                                                       | Derived from microbiome-metabolism                                                                                    |
| Propanal              |       |       | Endogenous & food (celeriacs, sourdocks, tartary buckwheats, arrowhead, mango, and deerberries)                                                                                                                                                                         |                                                                                                                       |
| Glycolaldehyde        |       |       | Endogenous & food                                                                                                                                                                                                                                                       |                                                                                                                       |
| Butanone              |       |       | Endogenous & food (dills, star fruits, napa cabbages, gooseberries, and pot marjorams)                                                                                                                                                                                  |                                                                                                                       |
| Butanal               |       |       | Endogenous & food (white lupines, ,jerusalem artichokes, citrus. agars. and prairie turnips)                                                                                                                                                                            | A biomarker for oxidative damage to lipids, proteins and DNA                                                          |
| Glyoxylic acid        |       |       | Endogenous & food                                                                                                                                                                                                                                                       | Be associated with primary hyperoxaluria                                                                              |
| Hydroxyacetone        |       |       | Endogenous & food (bog bilberries, cardoons, amaranths, black salsifies, and komatsuna)                                                                                                                                                                                 |                                                                                                                       |
| Lactaldehyde          |       |       | Endogenous                                                                                                                                                                                                                                                              |                                                                                                                       |
| Cyclopentanone        |       |       | Endogenous & food (potato and tomato, butter, meats, coffee, roasted peanut)                                                                                                                                                                                            |                                                                                                                       |
| Diacetyl              |       |       | Endogenous & food (nances, tartary buckwheats, tamarinds, pineapples, and celeriacs)                                                                                                                                                                                    | Be associated with several diseases such as crohn's disease, ulcerative colitis, and nonalcoholic fatty liver disease |
| 2-Methylbutyraldehyde |       |       | Endogenous & food (sugar apples, horned melons, hyacinth beans, persian limes, and root vegetables)                                                                                                                                                                     | Be associated with several diseases such as ulcerative colitis and nonalcoholic fatty liver disease                   |
| Valeraldehyde         |       |       | Endogenous & food (black walnuts, milk (cow), and safflowers, garden tomato, alcoholic beverages, cauliflowers, sweet bay, and fruits.)                                                                                                                                 |                                                                                                                       |
| Pyruvic acid          |       |       | Endogenous & food (chickpea, pea, sweet trefoil)                                                                                                                                                                                                                        |                                                                                                                       |
| Acetoin               |       |       | Food (cocoa and cocoa products, evergreen blackberries, orange bell peppers, tortilla chips, and pomes)                                                                                                                                                                 | Be associated with several diseases such as eosinophilic esophagitis and ulcerative colitis                           |
| Glyceraldehyde        |       |       | Endogenous                                                                                                                                                                                                                                                              | Cause chromosome damage to human cells in culture and is mutagenic in the Ames bacterial test                         |
| Furfural              |       |       | Food (coffee, calamus, matsutake mushroom, pumpkin, malt, peated malt, Bourbon vanilla, Lamb's lettuce, pimento leaf and various fruits, e.g. apple, apricot, sweet cherry, morello cherry, orange, grapefruit, Chinese quince and a common consist of essential oils.) |                                                                                                                       |
| Cyclohexanone         |       |       | Endogenous & food                                                                                                                                                                                                                                                       | The development of anosmia (an olfactory disorder) and rhinitis                                                       |

| Metabolite                 | Fecal | Urine | Source                                                                                                          | Biological relevance                                                                                                                                                                        |
|----------------------------|-------|-------|-----------------------------------------------------------------------------------------------------------------|---------------------------------------------------------------------------------------------------------------------------------------------------------------------------------------------|
| Glutaraldehyde             |       |       | Endogenous & food                                                                                               | Hydroxypyruvic acid is involved in the metabolic disorder called the dimethylglycine dehydrogenase deficiency pathway                                                                       |
| Hexanal                    |       |       | Endogenous & food (milk)                                                                                        |                                                                                                                                                                                             |
| 2-Ketobutyric acid         |       |       | Endogenous & food (mamey sapotes, peaches, amaranths, lotus, and pepper)                                        |                                                                                                                                                                                             |
| Hydroxypyruvic acid        |       |       | Endogenous & food (alcoholic beverages, cocoa and cocoa products, and milk and milk products)                   |                                                                                                                                                                                             |
| Benzaldehyde               |       |       | Endogenous & food                                                                                               |                                                                                                                                                                                             |
| Erythrose                  |       |       | Food                                                                                                            | Be associated with schizophrenia                                                                                                                                                            |
| oImp-Tolualdehyde          |       |       | Endogenous & food (sweet cherries, alcoholic beverages, garden tomato, coffee and coffee products, and tea)     | Chronically high levels of 3-methyl-2-oxovaleric acid are associated with maple syrup urine disease<br>Chronically high levels of ketoleucine are associated with maple syrup urine disease |
| Maltol                     |       |       | Endogenous & food (milk and milk products, nuts, soy beans, pepper (c. annuum), and coffee and coffee products) |                                                                                                                                                                                             |
| 3-Methyl-2-oxovaleric acid |       |       | Endogenous & food                                                                                               |                                                                                                                                                                                             |
| Ketoisocaproate            |       |       | Endogenous & food                                                                                               |                                                                                                                                                                                             |
| Acetophenone               |       |       | Food                                                                                                            |                                                                                                                                                                                             |
| 4-Hydroxybenzaldehyde      |       |       | Endogenous & food (cardoons, colorado pinyons, oyster mushrooms, common chokecherries, and potato)              | Derived from microbiome-metabolism                                                                                                                                                          |
| Cinnamaldehyde             |       |       | Food                                                                                                            |                                                                                                                                                                                             |
| Arabinose                  |       |       | Endogenous & food (sweet basil and tamarinds)                                                                   |                                                                                                                                                                                             |
| Ribose                     |       |       | Endogenous & food (small amounts of ribose can be found in ripe fruits and vegetables)                          |                                                                                                                                                                                             |
| Myrtenal                   |       |       | Endogenous & food                                                                                               |                                                                                                                                                                                             |
| Pyridoxal                  |       |       | Endogenous & food (sourdoughs, lichee, arctic blackberries, watercress, and cottonseeds)                        | Derived from microbiome-metabolism                                                                                                                                                          |
| 2-Undecanone               |       |       | Food (bananas, cloves, ginger, guava, strawberries, and wild-grown tomatoes)                                    |                                                                                                                                                                                             |
| Rhamnose                   |       |       | Endogenous & food                                                                                               |                                                                                                                                                                                             |

| Metabolite                  | Fecal | Urine | Source                                                                                                                                 | Biological importance                                                                                                                                                                                                                                         |
|-----------------------------|-------|-------|----------------------------------------------------------------------------------------------------------------------------------------|---------------------------------------------------------------------------------------------------------------------------------------------------------------------------------------------------------------------------------------------------------------|
| Menadione                   |       |       | Endogenous & food                                                                                                                      | Be associated with several diseases such as deafness, onychodystrophy, osteodystrophy, mental retardation, and seizures syndrome, attachment loss, and colorectal cancer<br><br>An important contribution to senescence and many age-related chronic diseases |
| 4-Hydroxyphenylpyruvic acid |       |       | Endogenous & food (nanking cherries, maltakes, pineapples, bitter gourds, and wakames)                                                 |                                                                                                                                                                                                                                                               |
| Fructose                    |       |       | Endogenous & food (Honey, tree fruits, berries, melons, and some root vegetables, such as beets, sweet potatoes, parsnips, and onions) |                                                                                                                                                                                                                                                               |
| Allose                      |       |       | Endogenous                                                                                                                             |                                                                                                                                                                                                                                                               |
| L-Sorbose                   |       |       | Endogenous & food                                                                                                                      |                                                                                                                                                                                                                                                               |
| D-Mannose                   |       |       | Endogenous & food                                                                                                                      |                                                                                                                                                                                                                                                               |
| Daidzein                    |       |       | Food (soy beans and other soy products)                                                                                                |                                                                                                                                                                                                                                                               |
| D-Glucose 6-phosphate       |       |       | Endogenous                                                                                                                             |                                                                                                                                                                                                                                                               |
| Retinal                     |       |       | Endogenous & food                                                                                                                      |                                                                                                                                                                                                                                                               |
| Luteolin                    |       |       | Food (food plants)                                                                                                                     |                                                                                                                                                                                                                                                               |
| α-Lactose                   |       |       | Endogenous & food (milk)                                                                                                               | Derived from microbiome-metabolism                                                                                                                                                                                                                            |
| Trehalose                   |       |       | Endogenous & food                                                                                                                      |                                                                                                                                                                                                                                                               |
| Maltose                     |       |       | Endogenous & food (yellow pond-lilies, sunflowers, spinachs, celacea (dolphin, porpoise, whale), and common octopus)                   |                                                                                                                                                                                                                                                               |
| Cortisolone                 |       |       | Endogenous & food                                                                                                                      |                                                                                                                                                                                                                                                               |

**Table S4.** Peak areas of the butanone-conjugate and two different internal standards in urine and blank samples were analyzed by UPLC-MS in positive ionization mode. EIC for each compound: Benzoic acid- $^{13}\text{C}_6$  ( $m/z = 129.0642$ ); Phenylalanine- $^{13}\text{C}_9$  ( $m/z = 176.1135$ ); and butanone-conjugate ( $m/z = 351.2026$ ).

| Experiment              | A [Conjugated butanone] | A [Internal standard 1<br>(Benzoic acid- $^{13}\text{C}_6$ )] | Ratio<br>(Conj-butanone/IS 1) | A [Internal standard 2<br>(Phenylalanine- $^{13}\text{C}_9$ )] | Ratio<br>(Conj-butanone/IS 2) |
|-------------------------|-------------------------|---------------------------------------------------------------|-------------------------------|----------------------------------------------------------------|-------------------------------|
| Urine sample            | 11,053                  | 1,059                                                         | 10.44                         | 499,589                                                        | 0.0221                        |
| H <sub>2</sub> O (1)    | 18,659                  | 771                                                           | 24.20                         | 474,115                                                        | 0.0394                        |
| H <sub>2</sub> O (2)    | 18,333                  | 905                                                           | 20.26                         | 502,336                                                        | 0.0365                        |
| Mean(H <sub>2</sub> O): | 18,496                  | 838                                                           | 22.23                         | 488,256                                                        | 0.0380                        |
| Recovery rate:          |                         |                                                               | 47.0%                         |                                                                | 58.2%                         |
